# Supplementary material for: Psychometric properties of the GAD-7 score to detect generalized anxiety in health professionals in Bolivia
Source: PubMed Central journal article supplement (PMC11397688; doi:10.17843/rpmesp.2022.391.8620), 2022-03-31
Supplement: rpmesp-39-01-8620-s001.pdf [file rpmesp-39-01-8620-s001.pdf]

## MATERIAL SUPLEMENTARIO

Anexo 1. Escala GAD-7.

| N | Preguntas                                                                                                   | En absoluto | Varios días | Más de la mitad de los días | Casi todos los días |
|---|-------------------------------------------------------------------------------------------------------------|-------------|-------------|-----------------------------|---------------------|
| 1 | ¿En los últimos 15 días ha presentado sensación de nerviosismo, de ansiedad, de tener los nervios de punta? | 0           | 1           | 2                           | 3                   |
| 2 | ¿En los últimos 15 días ha presentado incapacidad para eludir o controlar la preocupación?                  | 0           | 1           | 2                           | 3                   |
| 3 | ¿En los últimos 15 días ha presentado preocupación excesiva por diferentes cosas o situaciones?             | 0           | 1           | 2                           | 3                   |
| 4 | ¿En los últimos 15 días ha presentado dificultad para relajarse?                                            | 0           | 1           | 2                           | 3                   |
| 5 | ¿En los últimos 15 días ha presentado una intranquilidad de tal grado que no puede quedarse quieto?         | 0           | 1           | 2                           | 3                   |
| 6 | ¿En los últimos 15 días ha presentado facilidad para enfadarse o irritabilidad?                             | 0           | 1           | 2                           | 3                   |
| 7 | ¿En los últimos 15 días ha sentido miedo, como si pudiera suceder algo malo?                                | 0           | 1           | 2                           | 3                   |
